# Supplementary material
Source: publisher figshare collection journal article supplement (https://gsapubs.figshare.com/articles/dataset/_/12529481)
Supplement: Supplementary file 1 [file 1]

## Sheet: Whole rock data
Sample ID	BC93QNX02	BC93QNX03	BC93QSX04	BC93PAX01	BC93PAX03	BC93PAX07	BC93PAX11	BC93PAX12	BC93PAX14	BC10QSX101	BC10QSX104	BC10QSX106	BC10QSX107	BC10QSX108	BC10QSX111	BC10PAX102	BC10PAX103	BC10PAX107a	BC10PAX107b	BC10PAX110	BC10PAX112	BC10PAX113	BC10PAX127	BC10PAX128	BC10PAX131	BC10PAX132	BC10PAX134	BC10PAX136	BC10PAX138
Lithology	Grt-sill granulite	Microgranite	Microgranite	Grt-sill gneiss	Grt-sill granulite	Diorite	Diorite	Grt-sill gneiss	Grt-sill granulite	Grt-granulite	Dacite	Grt-granulite	Grt-granulite	Grt-quartzite	Dacite	Grt-mica schist	Diorite	Grt-granulite	Grt-granulite	Grt-granulite	Grt-granulite	Grt-granulite	Diorite	Grt-mica schist	Grt-quartzite	Grt-quartzite	Grt-sill granulite	Grt-quartzite	Grt-quartzite
SiO2	68.47	68.6699	69.3365	88.22	67.7422	56.8731	57.7071	79.81	65.07	67.3615	67.23	63.124	67.13	71.33	66.7004	77.596	52.95	77.4072	59.04	60.93	66.8124	63.39	52.7524	82.42	74.8138	76.7195	74.2482	73.34	70.27
Al2O3	13.35	15.1601	15.2611	6.61	13.6735	16.9983	15.085	13.26	16.74	12.4574	16.43	15.1554	14.18	14.89	15.6853	18.7131	20.28	10.5976	17.44	17.51	15.8991	15.71	25.6777	13.23	16.3389	14.8544	11.9539	15.16	18.11
Fe2O3	0.236	4.98637	4.63792	1.308	2.11457	2.82194	2.58184	0.502	0.343	0.05572	4.706	0.033165	0.016	4.36	4.78033	0.25929	3.242	0.10816	0.38	0.077	0.770835	0.024	4.39386	0.467	2.339	4.39314	0.83166	4.644	6.025
MgO	1.92	0.8585	0.8484	0.58	2.7675	5.4136	5.6682	0.82	1.7	2.65665	0.96	1.81905	1.02	0.6	1.3837	0.15075	4.25	1.0504	2.18	1.52	1.6482	1.28	4.422	0.29	0.21063	0.12036	1.54308	0.1	0.18
CaO	6.52	2.0705	1.9695	0.04	3.485	6.0196	5.93955	0.2	8.8	9.66145	2.36	12.874	11.54	2.78	2.6058	0.1809	5.78	6.812	9.73	12.52	6.8139	13.18	0.71355	0.65	1.73519	0.84252	4.03806	0.87	1.06
Na2O	0.64	3.3936	3.6158	0.15	2.32675	1.4039	1.93965	-0.02	0.59	0.398	3.37	0.27135	0.18	3	4.2117	0.03015	1.56	0.3224	0.46	0.35	1.4874	0.19	1.2663	0.1	3.03909	1.46438	2.02404	4.27	2.68
K2O	0.236	4.98637	4.63792	1.308	2.11457	2.82194	2.58184	0.502	0.343	0.05572	4.706	0.033165	0.016	4.36	4.78033	0.25929	3.242	0.10816	0.38	0.077	0.770835	0.024	4.39386	0.467	2.339	4.39314	0.83166	4.644	6.025
TiO2	0.754	0.59792	0.60398	0.429	0.81385	1.88062	1.27635	0.375	0.688	0.81988	0.595	0.63315	0.705	0.488	0.67266	0.11658	1.722	0.806	0.747	0.671	0.45225	0.572	0.897465	0.14	0.246738	0.052156	0.487974	0.06	0.131
MnO	0.203	0.02929	0.0303	0.065	0.126075	0.10908	0.15075	0.304	0.217	0.28059	0.018	0.270345	0.187	0.02	0.04444	0.01809	0.076	0.14144	0.77	0.428	0.18291	0.374	0.06432	0.015	0.004012	0.043129	0.203406	0.015	0.003
P2O5	0.239	0.17877	0.18281	0.026	0.175275	0.24947	0.36381	0.218	0.305	0.14129	0.277	0.258285	0.184	0.255	0.30199	0.16482	0.201	0.1976	0.298	0.274	0.57084	0.174	0.09447	0.485	0.05015	0.11033	0.34068	0.062	0.048
LOI	1.96	0.6	0.16	0.37	0.17	0.6587	0.53	0.45	0.06	0.57	1.17	0.19	0.08	0.55	0.2	1.26	1.9	0.12	1.55	0.57	0.13	0.01	0.87	0.17	0.25	0.26	0.43	0.51	0.56
Total	99.282	99.4537	99.5652	99.388	99.678	99.6296	99.5838	99.329	99.343	94.4582	101.822	94.662	95.238	102.633	101.367	98.749	95.203	97.671	92.975	94.927	95.5387	94.928	95.546	98.434	101.366	103.253	96.9326	103.675	105.092
Sc	11.158	3.129	2.812	7.706	12.304	13.641	24.65	8.492	13.198	12.1	5.313	11	11.17	3.781	5.256	3.27	10.78	8.358	11.16	8.824	11.85	10.29	19.67	3.207	14.55	2.461	5.566	2.944	5.339
V	84.791	35.659	34.365	19.905	77.753	175.379	124.876	27.864	82.496	84.33	40.94	85.61	109.2	28.9	47.76	38.57	187.7	45.86	105.6	110.4	93.77	107.4	174.1	22.45	6.319	5.692	34.29	2.266	3.973
Cr	58.2665	11.317	7.279	14.66	46.1075	51.6995	199.734	22.6165	43.102	15.9085	6.464	17.215	14.7915	26.828	27.85	6.7535	68.15	95.845	9.83	9.3625	15.3735	8.4535	26.315	58.14	2.508	2.94	5.3625	1.213	1.7585
Mn	0.162	0.025	0.024	0.054	0.1	0.089	0.122	0.218	0.166	0.246	0.018	0.241	0.166	0.02	0.042	0.02	0.068	0.129	0.671	0.374	0.163	0.33	0.059	0.025	0.006	0.038	0.167	0.014	0.005
Co	6.857	3.701	3.542	1.704	4.855	8.134	13.925	2.012	5.999	10.81	3.727	7.473	4.171	3.202	6.352	0.781	10.8	5.735	5.783	7.999	4.322	6.955	6.041	5.028	0.787	0.721	2.459	0.44	0.929
Ni	17.621	4.584	2.174	3.998	13.738	13.486	26.687	4.138	11.376	0.812	0.419	0.932	0.658	11.75	12.52	0.196	21.66	57.55	0.206	0.381	7.054	0.664	14.75	68.41	0.151	0.938	0.299	0.088	0.113
Cu	13.943	4.417	5.669	2.518	17.973	10.924	11.864	6.543	11.785	13.01	7.561	17.29	4.799	7.735	12.8	1.756	29.67	16.82	3.475	4.716	8.189	2.816	17.79	28.79	1.711	2.587	7.618	3.301	3.252
Zn	42.855	70.445	67.315	20.155	36.85	99.524	103.574	27.165	42.876	42.57	48.78	34.34	33.73	51.94	63.14	11.95	119.7	54.69	41.5	33.47	49.62	24.26	136.4	138.5	10.79	8.618	25.35	24.69	11.69
Ga	14.722	22.469	21.711	11.368	12.849	19.483	19.97	15.743	16.231	14.88	25.5	21.62	19.66	18.85	24.69	25.69	24.28	15.17	24.59	46.06	16.86	22.85	27.9	17.41	26.98	10.28	10.44	23.62	21.52
Rb	5.895	165.631	176.689	33.955	91.907	84.118	81.403	27.325	11.096	0.889	242.6	0.889	0.654	168.9	219.8	10.9	106.6	2.547	19.34	2.694	29.26	1.087	264	22.35	50.58	93.04	63.82	278.5	117.3
Sr	131.274	301.656	307.13	33.05	343.036	388.422	416.383	18.535	194.654	214.3	371.5	251	306.7	468.7	419.1	24.66	533.1	104.1	127.6	127.3	186.8	288.8	138.2	35.06	235.8	426.6	425.3	78.7	299.1
Y	26.92	8.301	8.021	14.344	19.174	19.252	22.226	30.157	28.173	32.94	14.41	30.53	29.52	9.261	13.86	12.61	7.517	24.81	54.34	38.4	30.26	32.34	13.49	36.64	13.99	6.124	20.6	12.49	5.381
Zr	206.3	313.2	301.8	314.4	191	117.2	147.6	166.9	172.9	-	-	-	-	-	-	-	-	-	-	-	-	-	-	-	-	-	-	-	-
Nb	19.299	15.517	11.169	12.447	13.049	14.516	13.458	17.103	11.407	15.36	18.44	16.55	11.89	14.35	18.3	1.925	16.68	18.3	20.32	34.23	12.95	9.847	12.68	2.523	15.64	1.187	10.63	18.08	4.16
Cs	1.275	1.812	1.607	0.528	6.402	1.531	0.999	1.492	0.503	0.074	12.67	0.055	0.068	3.538	7.067	0.773	2.071	0.227	0.583	0.245	1.676	0.101	19.28	1.52	0.854	1.375	9.15	4.172	0.954
Ba	44.643	1333.83	1440.83	291.404	561.268	1123.22	1043.81	138.393	89.796	17.25	919.1	12.37	8.796	1131	932.6	150.6	1583	26.06	67.93	81.85	52.38	23.52	1105	81.6	420.6	2549	1102	171.1	1629
La	32.678	106.193	62.379	24.71	16.71	46.472	11.947	22.362	25.668	37.15	58.13	34.77	32.9	44.91	60.22	15.06	34.76	33.69	29.45	27.24	28.93	15.97	39.25	12.79	17.7	4.49	13.34	27.64	9.367
Ce	64.826	199.79	115.384	50.613	29.052	97.303	31.074	46.03	49.728	77.96	116.4	70.81	67.5	88.29	122.5	29.38	71.09	66.92	60.86	57.91	53.63	34.8	78.3	28.22	148.5	8.204	27.4	55.81	17.66
Pr	7.665	21.602	12.709	5.85	3.321	12.742	5.05	5.618	5.972	9.392	13.94	8.631	8.005	10.57	14.39	3.868	8.947	8.179	7.471	6.899	6.402	4.395	9.748	3.679	16.84	1.03	3.279	6.617	2.097
Nd	30.08	75.063	44.305	22.895	12.706	53.51	26.271	22.783	24.029	37.01	52.06	34.32	31.1	39.7	54.31	14.93	34.53	31.79	29.75	27.55	25.15	17.94	37.75	16.08	64.53	4.08	13.08	22.97	7.94
Sm	5.7945	9.964	6.279	3.999	2.5585	9.987	7.056	4.6555	5.2305	7.094	8.765	6.6	5.8075	6.4415	8.798	2.8915	5.4175	6.1	6.4645	5.641	4.795	3.926	6.9535	4.4755	11.225	0.9305	3.096	5.446	1.489
Eu	1.3445	1.7775	1.4915	0.379	1	2.041	1.9185	0.4255	1.526	1.6995	1.664	1.412	1.508	1.78	1.685	0.25	1.7825	1.77	2.028	1.668	1.439	0.9565	1.5685	0.412	1.5415	2.32	1.0975	0.379	1.684
Gd	5.464	4.612	3.395	3.058	2.71	7.694	7.076	4.689	5.807	6.556	5.795	6.163	5.491	4.199	5.819	2.693	3.51	5.519	6.926	5.567	4.867	4.249	5.375	5.595	8.291	1.084	3.703	3.967	1.268
Tb	0.86	0.551	0.413	0.435	0.493	1.046	1.028	0.848	1.015	1.011	0.705	0.895	0.844	0.485	0.701	0.439	0.391	0.86	1.173	0.897	0.768	0.725	0.683	1.078	0.977	0.192	0.557	0.573	0.183
Dy	5.0225	2.3075	1.947	2.517	3.312	4.917	5.2985	5.49	5.813	5.5455	2.9945	4.865	4.681	2.032	2.9535	2.4265	1.652	4.558	7.2395	5.2795	4.388	4.4085	3.051	6.5505	3.838	1.1105	3.1885	2.4565	0.9465
Ho	1.046	0.355	0.327	0.625	0.788	0.833	0.956	1.269	1.14	1.155	0.492	1.013	0.975	0.325	0.481	0.475	0.267	0.862	1.681	1.154	0.939	1.01	0.523	1.302	0.552	0.207	0.704	0.382	0.18
Er	2.962	0.7705	0.763	2.162	2.4905	1.949	2.324	4.0395	3.064	3.0895	1.1015	2.726	2.659	0.6895	1.0705	1.195	0.614	2.1255	4.9455	3.2715	2.751	2.988	1.197	3.058	0.97	0.5075	2.0325	0.9135	0.452
Tm	0.481	0.099	0.11	0.398	0.423	0.271	0.319	0.763	0.484	0.525	0.161	0.464	0.434	0.094	0.156	0.188	0.095	0.336	0.909	0.571	0.501	0.545	0.187	0.428	0.097	0.077	0.355	0.154	0.069
Yb	3.074	0.5665	0.6605	2.848	2.8035	1.57	1.9425	5.652	3.232	3.257	0.8475	2.792	2.6975	0.472	0.8285	1.101	0.543	1.9985	5.7185	3.498	3.449	3.509	1.085	2.1555	0.3935	0.447	2.1725	0.984	0.377
Lu	0.489	0.077	0.092	0.488	0.442	0.222	0.29	0.963	0.531	0.533	0.122	0.425	0.447	0.065	0.117	0.18	0.085	0.319	0.911	0.536	0.605	0.582	0.176	0.299	0.059	0.068	0.339	0.157	0.059
Ta	1.54	0.982	0.857	0.637	1.073	1.141	0.553	3.217	1.059	1.174	1.672	0.879	0.787	1.137	1.509	0.132	1.173	1.385	1.458	1.142	0.948	0.698	1.107	0.193	0.49	0.15	0.768	2.651	0.229
Pb	10.383	32.994	31.955	6.319	26.541	8.707	8.307	3.814	9.361	4.92633	33.2633	3.33367	7.785	20.9733	19.73	6.73967	8.459	3.247	5.808	3.845	7.235	3.968	14.7033	2.79867	19	36.61	11.9967	36.3667	42.6867
Th	13.604	39.42	21.486	10.486	6.085	12.196	2.224	7.33	12.328	12.23	18.67	9.901	12.12	13.82	19.28	4.074	8.921	13.34	9.114	10.39	8.473	6.261	13.99	2.181	33.86	0.785	8.019	12.42	3.933
U	1.675	1.958	0.871	0.727	0.848	1.793	0.759	1.419	1.372	1.962	6.671	1.057	1.256	1.973	5.072	0.729	1.731	2.542	3.05	1.852	1.711	1.036	3.312	0.89	1.986	0.333	0.655	2.32	0.484
87Sr/86Sr	0.73676	0.712017	0.712014	0.71938	0.722624	0.712595	0.710481	0.717314	0.732878	-	0.712227	0.730022	0.736619	-	0.711805	-	-	0.721485	0.721154	-	-	0.732611	-	0.71807	-	-	-	0.720317	-
143Nd/144Nd	0.51185	0.511929	0.51198	0.511872	0.511846	0.512091	0.512168	0.511966	0.511885	-	0.512179	0.511913	0.511829	-	0.512207	-	-	0.511917	0.511948	-	-	0.511989	-	0.511937	-	-	-	0.51199	-
206Pb/204Pb	18.6467	17.7675	17.788	18.1733	18.427	18.7224	18.4375	18.6679	18.5024	-	18.6031	18.7475	18.612	-	18.7691	-	-	18.6104	18.5443	-	-	18.5634	18.9329	18.5823	-	18.5117	-	18.2935	-
207Pb/204Pb	15.6703	15.6127	15.6134	15.6374	15.6657	15.6788	15.6565	15.6783	15.6733	-	15.6525	15.6893	15.6808	-	15.6826	-	-	15.6735	15.6696	-	-	15.6827	15.6923	15.6654	-	15.6687	-	15.6528	-
208Pb/204Pb	39.13	38.4744	38.4893	38.9464	39.0213	39.0032	38.9603	38.8238	39.1655	-	38.9054	39.4635	39.2028	-	38.9856	-	-	38.7561	38.744	-	-	39.3563	39.1089	38.9218	-	38.6604	-	39.1755	-

## Sheet: Garnet data
	Na2O	Al2O3	SiO2	CaO	FeO	MgO	MnO
	0.0163	21.3276	37.2948	1.4	34.4339	4.1223	1.8206
	0.0247	21.2165	36.9804	1.3849	34.6071	4.1405	1.9084
	0	21.3357	37.2992	1.3016	34.2877	4.2038	2.2345
	0.0005	21.5422	37.0123	1.7736	33.148	4.4622	2.3599
	0.0018	21.3848	37.3341	1.4384	34.1132	4.0843	2.0734
	0.0288	21.392	37.2036	1.2454	34.1544	4.1285	2.0648
	0.005	21.5088	37.2483	1.2971	33.9583	4.1181	2.2716
	0.0013	21.6962	37.0927	1.4095	33.1377	4.4044	2.5291
	0.0075	21.3879	37.0914	1.4556	33.0318	4.2785	2.6709
	0.0068	21.2228	36.4957	1.7979	33.0841	4.4016	2.4869
	0.0141	21.227	36.729	1.7757	32.9145	4.524	2.1878
	0.0259	21.3293	36.945	1.7778	32.7378	4.4186	2.2967
	0.0203	21.3983	37.2183	1.4424	34.4049	4.0291	1.9855
	0.0208	21.3308	37.3105	1.3688	34.5307	4.129	2.1002
	0.0176	21.3827	37.3198	1.423	34.1877	4.1343	2.2476
	0.0112	21.3552	37.2034	1.4491	33.6722	4.4324	2.4584
	0.0156	21.2658	36.8252	1.3375	33.6948	4.0663	2.8484
	0.0039	21.2426	36.7027	1.3692	34.0672	3.8189	2.8237
	0.0077	21.1941	36.8489	1.4407	34.1581	3.8293	2.829
	0.0182	21.3259	36.9288	1.476	34.0579	3.7691	2.8153
	0.0061	21.2714	36.8674	1.5407	34.0702	3.667	2.8245
	0.0284	21.1048	36.8716	1.4717	34.1508	3.7544	2.8304
	0.009	21.2566	37.0477	1.4496	33.8178	3.7483	2.8086
	0.0202	21.1989	37.0168	1.4356	34.1692	3.7578	2.7747
	0.0289	21.4651	36.9111	1.3997	34.0442	3.7836	2.8081
	0.0138	21.6009	36.929	1.4213	33.8482	4.1661	2.8641
	0.0152	21.247	36.749	1.4814	33.4708	3.7809	3.2438
	0.008	21.2208	36.7548	1.4628	33.5779	3.8313	3.1888
	0.0023	21.1076	37.1327	1.2973	33.5997	4.0563	3.1134
	0.0035	21.2144	37.0715	1.3673	33.3166	4.0876	3.0148
	0.0242	21.3309	37.3236	1.26	33.3383	4.2705	2.983
	0.0328	21.4023	36.7659	1.4282	33.9349	4.1263	2.3537
	0.0132	21.2849	36.9456	1.3902	33.803	4.1656	2.357
	0.0084	21.5328	36.9622	1.3673	33.9129	4.1333	2.4099
	0.0165	21.313	37.0201	1.4054	34.3048	4.1023	2.3495
	0.0081	21.2641	37.0747	1.3069	33.7627	4.1558	2.4548
	0.0114	21.5265	36.9089	1.3736	34.0953	4.1562	2.2753
	0.0084	21.338	36.7054	1.3543	34.0862	4.125	2.3291
	0.0022	21.2689	36.6452	1.3401	33.7054	4.1321	2.4797
	0.0094	21.3279	37.0781	1.3007	33.6831	4.3153	2.756
	0.0122	21.3299	37.0177	1.7853	32.8609	4.3373	2.5716
	0.0254	21.1175	36.8377	1.5536	33.3057	3.9967	3.0677
	0.0192	21.3886	37.285	1.5163	33.6713	3.7463	3.1531
	0.0142	21.5257	37.2573	1.5242	33.6936	3.751	3.0823
	0.0017	21.2711	36.9734	1.269	33.9597	3.8457	3.0344
	0.0117	21.4688	37.1599	1.3892	33.8827	3.9997	2.9669
	0.0241	21.321	37.0299	1.142	33.4898	4.4764	2.6543
	0.0086	21.292	37.2701	1.3588	33.5193	4.277	2.7883
	0.0085	21.1294	36.9426	1.4329	33.9283	3.9603	2.5223
	0.0006	21.1888	36.6608	1.3612	34.2668	4.0401	2.5539
	0.0105	21.1455	36.5878	1.3018	33.9209	4.0764	2.6358
	0.0157	21.2804	36.9502	1.3507	33.616	4.1082	2.7388
	0.0187	21.4451	36.6975	1.7786	33.0179	4.4969	2.3146
	0.0109	21.1888	36.9383	1.7241	33.3016	4.3366	2.5432
	0.0167	21.1195	36.8387	1.757	32.9538	4.6063	2.1936
	0.0092	21.3523	37.6125	1.6437	31.8018	3.9766	4.4178
	0.0238	20.9839	37.2637	1.6604	31.5796	3.9148	4.6469
	0.0048	21.1025	37.242	1.6702	31.7458	3.8469	4.7659
	0.0346	21.0567	37.5488	1.7143	31.3669	3.8373	4.6342
	0.0069	21.2399	37.2875	1.651	31.9408	4.0817	4.2816
	0.001	21.2337	37.5462	1.7194	31.6676	4.3094	3.9025
	0.004	21.444	37.3817	1.6146	31.8295	4.1395	4.1498
	0.0051	21.4798	37.3764	1.6843	31.8041	4.0959	4.3135
	0.0046	21.2414	37.5495	1.6405	31.6837	4.064	4.3692
	0.0006	21.4422	37.6776	1.6228	31.7428	4.1266	4.2506
	0.0291	21.4004	37.2078	1.6677	31.6884	4.2182	4.0458
	0.0211	21.0277	37.2153	1.6668	31.7703	3.5852	5.2018
	0.0102	21.2591	37.1487	1.6515	31.464	3.5492	5.315
	0.0023	21.2343	37.1643	1.6901	31.5715	3.6219	5.1767
	0.0097	21.4085	37.2287	1.7634	31.7637	3.7097	5.0863
	0.0135	21.2751	37.1486	1.8413	31.3839	3.6937	4.8596
	0.0166	21.4577	37.0656	1.6166	31.9928	3.9727	4.6012
	0.0149	21.4504	37.1468	1.5391	31.6146	4.1106	4.3588
	0.0078	21.2402	36.9327	1.6939	31.8672	3.9097	4.7442
	0.03	21.0979	37.1655	1.7494	31.8294	3.8709	4.7394
	0.0142	21.2276	37.0015	1.715	31.7351	3.9461	4.5472
	0.0275	21.2408	37.2824	1.7203	31.6988	3.9572	4.4746
	0.0255	21.3837	36.9405	1.6639	31.687	4.0799	4.3224
	0.0145	21.3466	37.1285	1.5712	31.6068	4.1554	4.2074
	0.0026	21.3793	37.3918	1.7682	31.5184	4.1889	3.8918
	0.0037	21.1814	37.3774	1.6922	31.5738	4.2534	3.7761
	0.0121	21.4908	37.1298	1.6484	31.7317	3.7756	4.7335
	0.0014	21.5142	37.2831	1.5936	31.7167	3.8421	4.8092
	0.0091	21.3239	37.3706	1.6687	31.9754	3.9109	4.7162
	0.0219	21.4332	37.1724	1.6305	31.6388	3.9869	4.614
	-0.0033	21.424	36.9863	1.6134	31.5134	4.0626	4.3584
	0.0154	21.314	37.6517	1.653	31.7287	4.1442	4.0858
	0.0086	21.2882	37.2564	1.574	31.5631	4.2255	4.0282
	0.0131	21.3013	37.5486	1.7301	31.9448	4.2661	3.8339
	0.0169	21.2583	37.517	1.725	31.7406	4.2679	3.8336
	0.0142	21.2173	37.3661	1.6506	31.8869	4.2838	3.9072
	0.0088	21.2011	37.5127	1.6374	31.954	4.2483	3.9584
	0.0135	21.4186	37.4016	1.6346	31.8533	4.3064	3.8513
	0.0103	21.4042	37.4166	1.7279	31.1228	4.2637	3.7547
	0.0185	21.1587	37.5424	1.6258	31.758	4.1578	4.3434
	0.0041	21.2679	37.2741	1.6445	31.8796	3.8685	4.705
	0.0151	21.0566	37.1772	1.6634	31.7561	3.7973	4.6814
	0.0165	21.1871	37.3206	1.6315	31.7579	3.8943	4.6927
	0.0391	21.4216	37.2949	1.6019	31.6697	4.024	4.4887
	0.0118	21.1418	37.7712	1.5272	32.1097	4.2322	4.1672
	0.0086	21.2466	37.5358	1.7018	31.6222	4.1851	3.9057
	0.0294	21.2606	37.2059	1.6403	31.7794	4.0018	4.3661
	0.0196	21.2333	36.8092	1.6772	31.721	3.91	4.5081
	0.0221	21.3954	37.2919	1.6486	31.8972	4.0299	4.3783
	0.0187	21.4429	37.228	1.6763	31.7015	4.1481	4.1762
	0.0254	21.2622	37.2417	1.6194	31.507	4.1562	3.9642
	0.017	21.1776	37.3999	1.7271	31.579	4.0111	4.4607
	0.0168	21.0404	37.1535	1.6629	31.9902	3.952	4.4675
	0.0325	20.998	37.5156	1.6436	31.9048	4.0035	4.3563
	0.0344	21.0407	37.3742	1.6663	32.0553	4.1275	4.2046
	0.0349	21.1314	37.5012	1.6258	31.5651	4.1502	3.9575
	0.0267	21.3178	37.4219	1.6774	31.6369	4.245	3.8899
